# Supplementary material
Source: Springer Nature journal article supplement (https://www.springermedizin.de/resource/supplementary/12879_2012_2211_MOESM1_ESM.pdf/9443830)

HSV viral load (log<sub>10</sub> copies/μL)

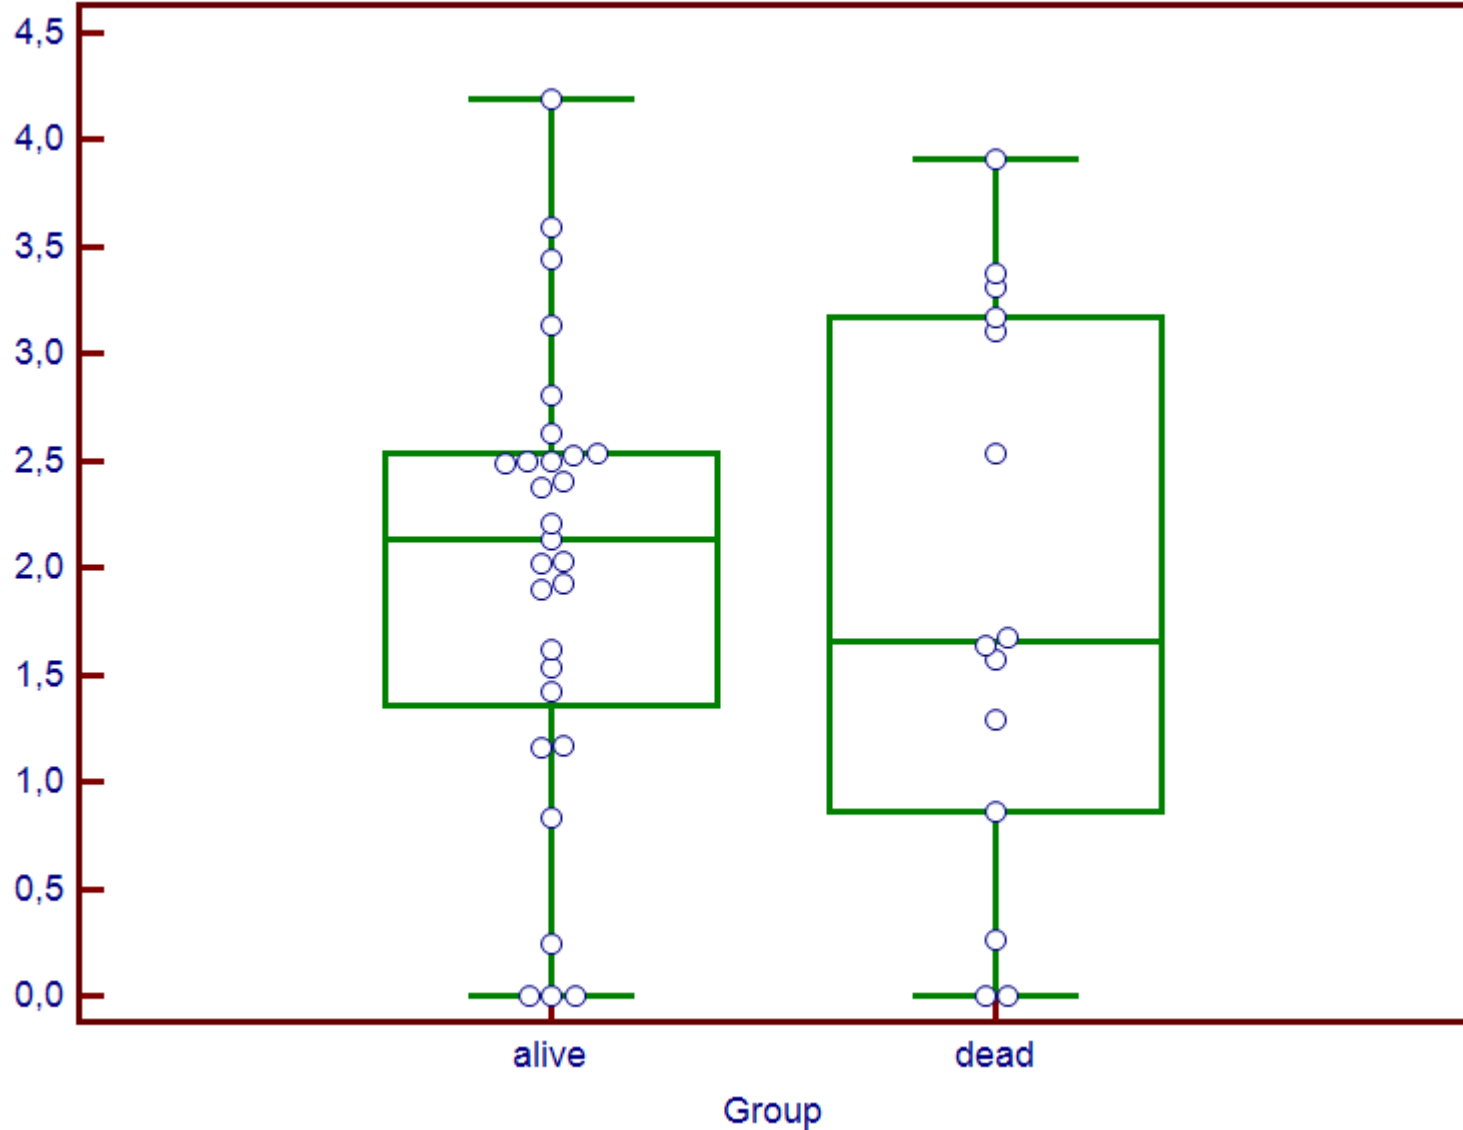

Supplement: MOESM1 [file 9443830]
